# Supplementary material
Source: PubMed Central journal article supplement (PMC2633422)

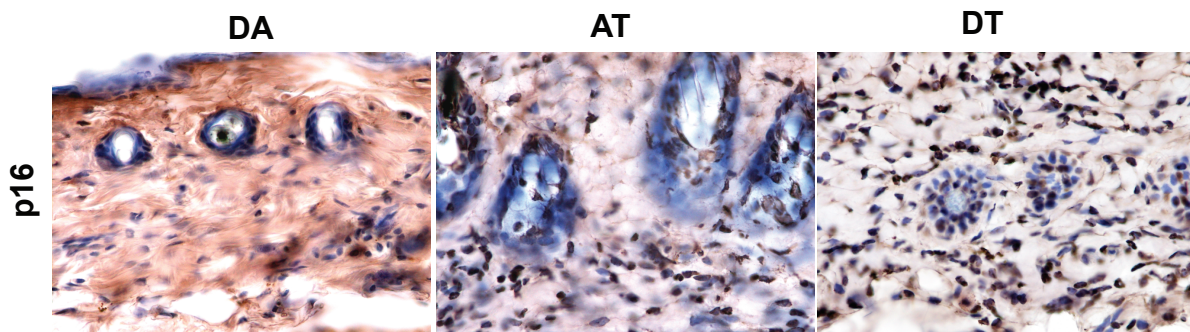

Supplement: NIHMS79684-supplement-Supp_Fig__1.pdf [file NIHMS79684-supplement-Supp_Fig__1.pdf]

## Pazolli Supplemental Figure 2

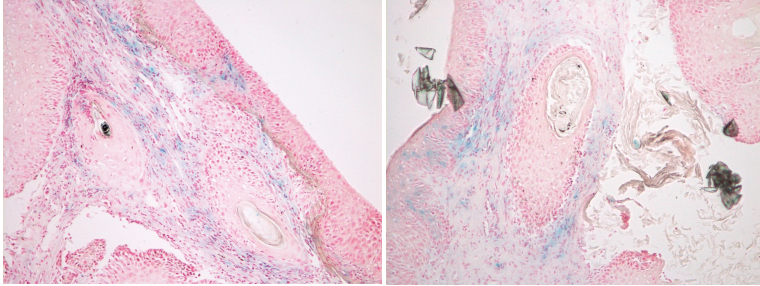

Supplement: NIHMS79684-supplement-Supp_Fig__2.pdf [file NIHMS79684-supplement-Supp_Fig__2.pdf]

### Pazolli Supplemental Figure 3

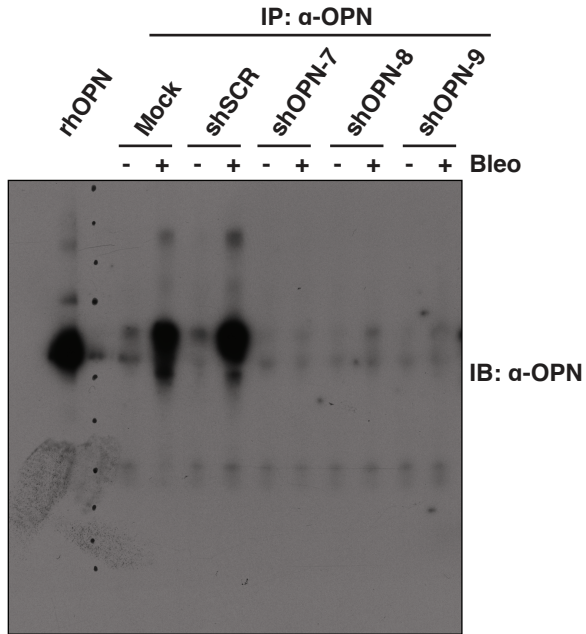

Supplement: NIHMS79684-supplement-Supp_Fig__3.pdf [file NIHMS79684-supplement-Supp_Fig__3.pdf]
